1 **Yet another mitochondrial genome of the Pacific cupped oyster: the published**  
2 **mitogenome of *Alectryonella plicatula* (Ostreinae) is based on a misidentified**  
3 ***Magallana gigas* (Crassostreinae)**

4 Daniele Salvi<sup>1, @</sup>, Emanuele Berrilli<sup>1</sup>, Matteo Garzia<sup>1</sup>, Paolo Mariottini<sup>2</sup>

5

6 1 Department of Health, Life and Environmental Sciences, University of L'Aquila, Via Vetoio, 67100 Coppito,  
7 L'Aquila, Italy.

8 2 Dipartimento di Scienze, Università Roma Tre, Viale G. Marconi 446, 00146 Rome, Italy

9

10 @: Corresponding author: Daniele Salvi, [danielesalvi.bio@gmail.com](mailto:danielesalvi.bio@gmail.com)

11

12

13 **Abstract**

14 The recently published mitochondrial genome of the fingerprint oyster *Alectryonella plicatula*  
15 (Gmelin, 1791) with GenBank accession number MW143047 was resolved in an unexpected  
16 phylogenetic position, as sister to the Pacific cupped oyster *Magallana gigas* (Thunberg, 1793) and  
17 share with this species three typical gene duplications that represent robust synapomorphies of the  
18 *Magallana* clade. In this study, we verified the identity of MW143047 using direct comparisons of  
19 single gene sequences, DNA barcoding and phylogenetic analyses. BLAST searches using each of  
20 the 12 protein coding genes and rRNA genes extracted from MW143047 as query retrieved *M.*  
21 *gigas* as best hit with 100% sequence identity. MW143047 is nested within the clade formed by *M.*  
22 *gigas* sequences, with virtually no difference between their terminal branch lengths, both in the  
23 *cox1* gene tree (based on 3639 sequences) and in the 16S gene tree (based on 1839 sequences), as  
24 well as in the Maximum Likelihood mitogenomic tree based on concatenated sequence of 12 PCGs.  
25 Our findings suggest that the original specimen used for mitogenome sequencing was misidentified  
26 and represents an individual of *M. gigas*. This study reinforces the notion that morphological shell  
27 analysis alone is not sufficient for oyster identification, not even at high taxonomic ranks such as  
28 subfamilies. While it is well established that morphological identification of oysters should be  
29 validated by molecular data, this study emphasizes that also molecular data should be taxonomically  
30 validated by means of DNA barcoding and phylogenetic analyses. The implications of the  
31 publication of taxonomically misidentified sequences and mitogenomes are discussed.

32

33

34 **Keywords:** DNA barcoding; *Magallana*; misidentification; Ostreidae; oyster; phylogeny

35

36

37

## 38 Introduction

39 Oysters are distributed worldwide in temperate and tropical waters and several of them have a great  
40 economic importance. However, taxonomic identification of oysters based on morphological  
41 characters is challenging, even for species locally cultivated since centuries (e.g. Wang et al., 2004;  
42 Hsiao et al., 2016). Indeed, oysters' shells show a high degree of phenotypic plasticity driven by  
43 environmental factors, therefore, shell morphology is often uninformative or misleading for  
44 taxonomic identification and classification. The use of molecular data has been fruitful for species  
45 identification and has resulted in a well-established phylogeny and systematics of oysters (Salvi et  
46 al., 2014; Salvi & Mariottini, 2017). The mitochondrial genome has been the most valuable source  
47 of molecular data for oyster species identification (DNA barcoding), phylogenetic reconstruction  
48 and classification (e.g. Wang et al., 2004; Liu et al., 2011; Salvi et al., 2014; Raith et al., 2016).  
49 Moreover, mitochondrial gene rearrangements, such as transpositions and duplications, has  
50 provided additional characters for phylogenetic inference, classification and diagnosis of oysters'  
51 genera and subfamilies (Salvi & Mariottini, 2021). Molecular resources of oyster are continuously  
52 growing, and most studies currently implement these data for taxonomic identification. For this  
53 purpose, a reliable reference of taxonomically identified sequences and mitogenomes is necessary  
54 (Bortolus, 2008; Jin et al., 2020; Salvi et al., 2020).

55 Recently, the complete mitochondrial genome of the fingerprint oyster *Alectryonella*  
56 *plicatula* (Gmelin, 1791), with GenBank accession number MW143047, has been characterised  
57 (Wang et al., 2021) and resolved in an unexpected phylogenetic position, as sister to the Pacific  
58 cupped oyster *Magallana gigas* (Thunberg, 1793). Unfortunately, in this mitogenome  
59 announcement the phylogenetic position of MW143047 is described in a cladogram with arbitrary  
60 branch lengths (Wang et al., 2021), therefore masking the true evolutionary divergence between  
61 MW143047 and the mitogenome of *M. gigas* (see Botero-Castro et al., 2016). However, their sister  
62 relationship is surprising and in sharp contrast with all previous phylogenetic studies that have  
63 consistently established the placement of *A. plicatula* within the lophinae lineage, that is nested  
64 within the subfamily Ostreinae Rafinesque, 1815, whereas *M. gigas* belong to the well-defined  
65 clade of Indo-Pacific Crassostreinae Scarlato & Starobogatov, 1979 (O'Foighil & Taylor, 2000;  
66 Salvi et al., 2014; Crocetta et al., 2015; Salvi & Mariottini, 2017; Al-Kandari et al., 2021).  
67 Moreover, the newly published mitogenome MW143047 conforms to the mitochondrial gene  
68 arrangement of *M. gigas*, that is characterised by the duplication of *trnK*, *trnQ* and *rrnS* genes that  
69 are exclusive of the *Magallana* clade (Ren et al., 2010) and represent robust synapomorphies of this  
70 clade (Salvi et al., 2014; Salvi & Mariottini, 2017, 2021). These intriguing points are urgent to  
71 clarify as MW143047 might become the mitogenomic reference of *A. plicatula*. In this study, we  
72 verified the taxonomic identification of Wang et al (2021) using available quality control guidelines  
73 for taxonomic validation of new mitogenomes (Botero-Castro et al., 2016).

74

75

76

77

78

79

## 80 **Materials and Methods**

81 We verified the identity of MW143047 using DNA barcoding and phylogenetic analyses.

82 We extracted from the mitogenome MW143047 the two barcoding fragments commonly used for  
83 oysters, the *cox1* and the 3' half portion of the 16S rRNA (Liu et al 2011; Crocetta et al., 2015), as  
84 well the remaining protein coding genes and rRNAs (12S and the 5' half portion of the 16S) using  
85 Geneious Prime 2021 (Biomatters Ltd., Auckland, New Zealand). Sequence of each gene were used  
86 as query in BLAST searches using default settings. Sequences of the barcoding markers *cox1* and the  
87 16S were aligned with oysters' sequences available from public database (BOLD and NCBI)  
88 assembled, dereplicated, and aligned following the procedure by Salvi et al. (2020). A Neighbor-  
89 Joining (NJ) tree was constructed based on uncorrected *p*-distance values in MEGA v. 7 (Kumar et  
90 al., 2016) with pairwise deletion and 100 replicates of bootstrap (BS).

91 We inferred a Maximum Likelihood (ML) tree based on the concatenated sequences of 12 protein-  
92 coding genes (PCGs) of the same oyster taxa analysed by Wang et al. (2021) plus six additional  
93 mitogenome sequences of *M. gigas*, to further assess phylogenetic relationships and divergence  
94 between the latter and the mitogenome MW143047. ML analyses were performed in IQTREE v  
95 1.6.12 (Nguyen et al., 2015) using for each gene partition the best substitution model determined by  
96 the ModelFinder module (Kalyaanamoorthy et al., 2017) and 1000 replicates of ultrafast  
97 bootstrapping.

98

99

## 100 **Results**

101 Results of BLAST searches using as query the *cox1* and the 16S sequences extracted from  
102 MW143047 retrieved as best hits sequences assigned to *M. gigas* with a sequence identity of 100%  
103 (sequence identity ranging from 99.85% to 100% among the best 10 hits for *cox1* and of 100% for  
104 16S; Table 1). The same result was obtained in BLAST searches using as query the other 11 protein  
105 coding genes and rRNAs extracted from MW143047, with 100% of nucleotides identical to multiple  
106 sequences of *M. gigas*.

107 In the gene tree based on 3639 *cox1* sequences (Fig 1a) and in the gene tree based on 1839  
108 16S sequences (Fig 1b) MW143047 clustered with *M. gigas* with maximum bootstrap support  
109 (BS=100%).

110 In the ML mitogenomic tree (Fig 2) MW143047 is nested within the clade formed by *M. gigas*  
111 sequences, with virtually no difference between their terminal branch lengths. This clade was sister  
112 to the mitogenome sequence of *M. angulata* (BS=100%) within the well supported clade formed by  
113 *Magallana* species (BS=100%).

114

115

116

117 **Table 1.** Top ten best hits of BLAST results using as query the sequences of the barcoding fragments  
 118 *coxI* (above) and 16S rRNA (below) extracted from the complete mitochondrial genome MW143047.

| Query sequence: <i>coxI</i> MW143047 |                          |                         |                         |           |             |             |         |            |                  |
|--------------------------------------|--------------------------|-------------------------|-------------------------|-----------|-------------|-------------|---------|------------|------------------|
| Accession                            | Reported scientific name | Current scientific name | Isolate / Voucher       | Max Score | Total Score | Query Cover | E-value | % Identity | Accession Length |
| MN862563                             | <i>Crassostrea gigas</i> | <i>Magallana gigas</i>  | isolate EU1             | 1205      | 1205        | 69%         | 0       | 100.00%    | 655              |
| KJ855245                             | <i>Crassostrea gigas</i> | <i>Magallana gigas</i>  | isolate WF34            | 1205      | 1736        | 100%        | 0       | 100.00%    | 18225            |
| KJ855244                             | <i>Crassostrea gigas</i> | <i>Magallana gigas</i>  | isolate YK05            | 1205      | 1736        | 100%        | 0       | 100.00%    | 18225            |
| KJ855241                             | <i>Crassostrea gigas</i> | <i>Magallana gigas</i>  | isolate CgJap23 voucher | 1205      | 1736        | 100%        | 0       | 100.00%    | 18225            |
| FJ717608                             | <i>Crassostrea gigas</i> | <i>Magallana gigas</i>  | LBDM385                 | 1205      | 1205        | 69%         | 0       | 100.00%    | 692              |
| HM626169                             | <i>Crassostrea gigas</i> | <i>Magallana gigas</i>  | isolate 618 mtDNA       | 1205      | 1205        | 69%         | 0       | 100.00%    | 675              |
| AF177226                             | <i>Crassostrea gigas</i> | <i>Magallana gigas</i>  | genome voucher          | 1205      | 1736        | 100%        | 0       | 100.00%    | 18224            |
| MT219484                             | <i>Crassostrea gigas</i> | <i>Magallana gigas</i>  | UHHCL21                 | 1201      | 1201        | 69%         | 0       | 100.00%    | 651              |
| MN862571                             | <i>Crassostrea gigas</i> | <i>Magallana gigas</i>  | isolate EU9             | 1199      | 1199        | 69%         | 0       | 99.85%     | 655              |
| MN862570                             | <i>Crassostrea gigas</i> | <i>Magallana gigas</i>  | isolate EU8             | 1199      | 1199        | 69%         | 0       | 99.85%     | 655              |
| Query sequence: 16S MW143047         |                          |                         |                         |           |             |             |         |            |                  |
| Accession                            | Reported scientific name | Current scientific name | Isolate / Voucher       | Max Score | Total Score | Query Cover | E-value | % Identity | Accession Length |
| MN862573                             | <i>Crassostrea gigas</i> | <i>Magallana gigas</i>  | isolate EU2 isolate     | 905       | 905         | 100%        | 0       | 100.00%    | 494              |
| MF663018                             | <i>Crassostrea gigas</i> | <i>Magallana gigas</i>  | CGSC1b isolate          | 905       | 905         | 100%        | 0       | 100.00%    | 540              |
| MF663017                             | <i>Crassostrea gigas</i> | <i>Magallana gigas</i>  | CGSC1a                  | 905       | 905         | 100%        | 0       | 100.00%    | 532              |
| KJ855245                             | <i>Crassostrea gigas</i> | <i>Magallana gigas</i>  | isolate WF34            | 905       | 905         | 100%        | 0       | 100.00%    | 18225            |
| KJ855244                             | <i>Crassostrea gigas</i> | <i>Magallana gigas</i>  | isolate YK05            | 905       | 905         | 100%        | 0       | 100.00%    | 18225            |
| KJ855243                             | <i>Crassostrea gigas</i> | <i>Magallana gigas</i>  | isolate YK01            | 905       | 905         | 100%        | 0       | 100.00%    | 18225            |
| KJ855242                             | <i>Crassostrea gigas</i> | <i>Magallana gigas</i>  | isolate JN14            | 905       | 905         | 100%        | 0       | 100.00%    | 18224            |
| KJ855241                             | <i>Crassostrea gigas</i> | <i>Magallana gigas</i>  | isolate CgJap23         | 905       | 905         | 100%        | 0       | 100.00%    | 18225            |
| FJ478033                             | <i>Crassostrea gigas</i> | <i>Magallana gigas</i>  | isolate CG38            | 905       | 905         | 100%        | 0       | 100.00%    | 511              |
| EU672831                             | <i>Crassostrea gigas</i> | <i>Magallana gigas</i>  | isolate ORCg-4          | 905       | 905         | 100%        | 0       | 100.00%    | 18225            |

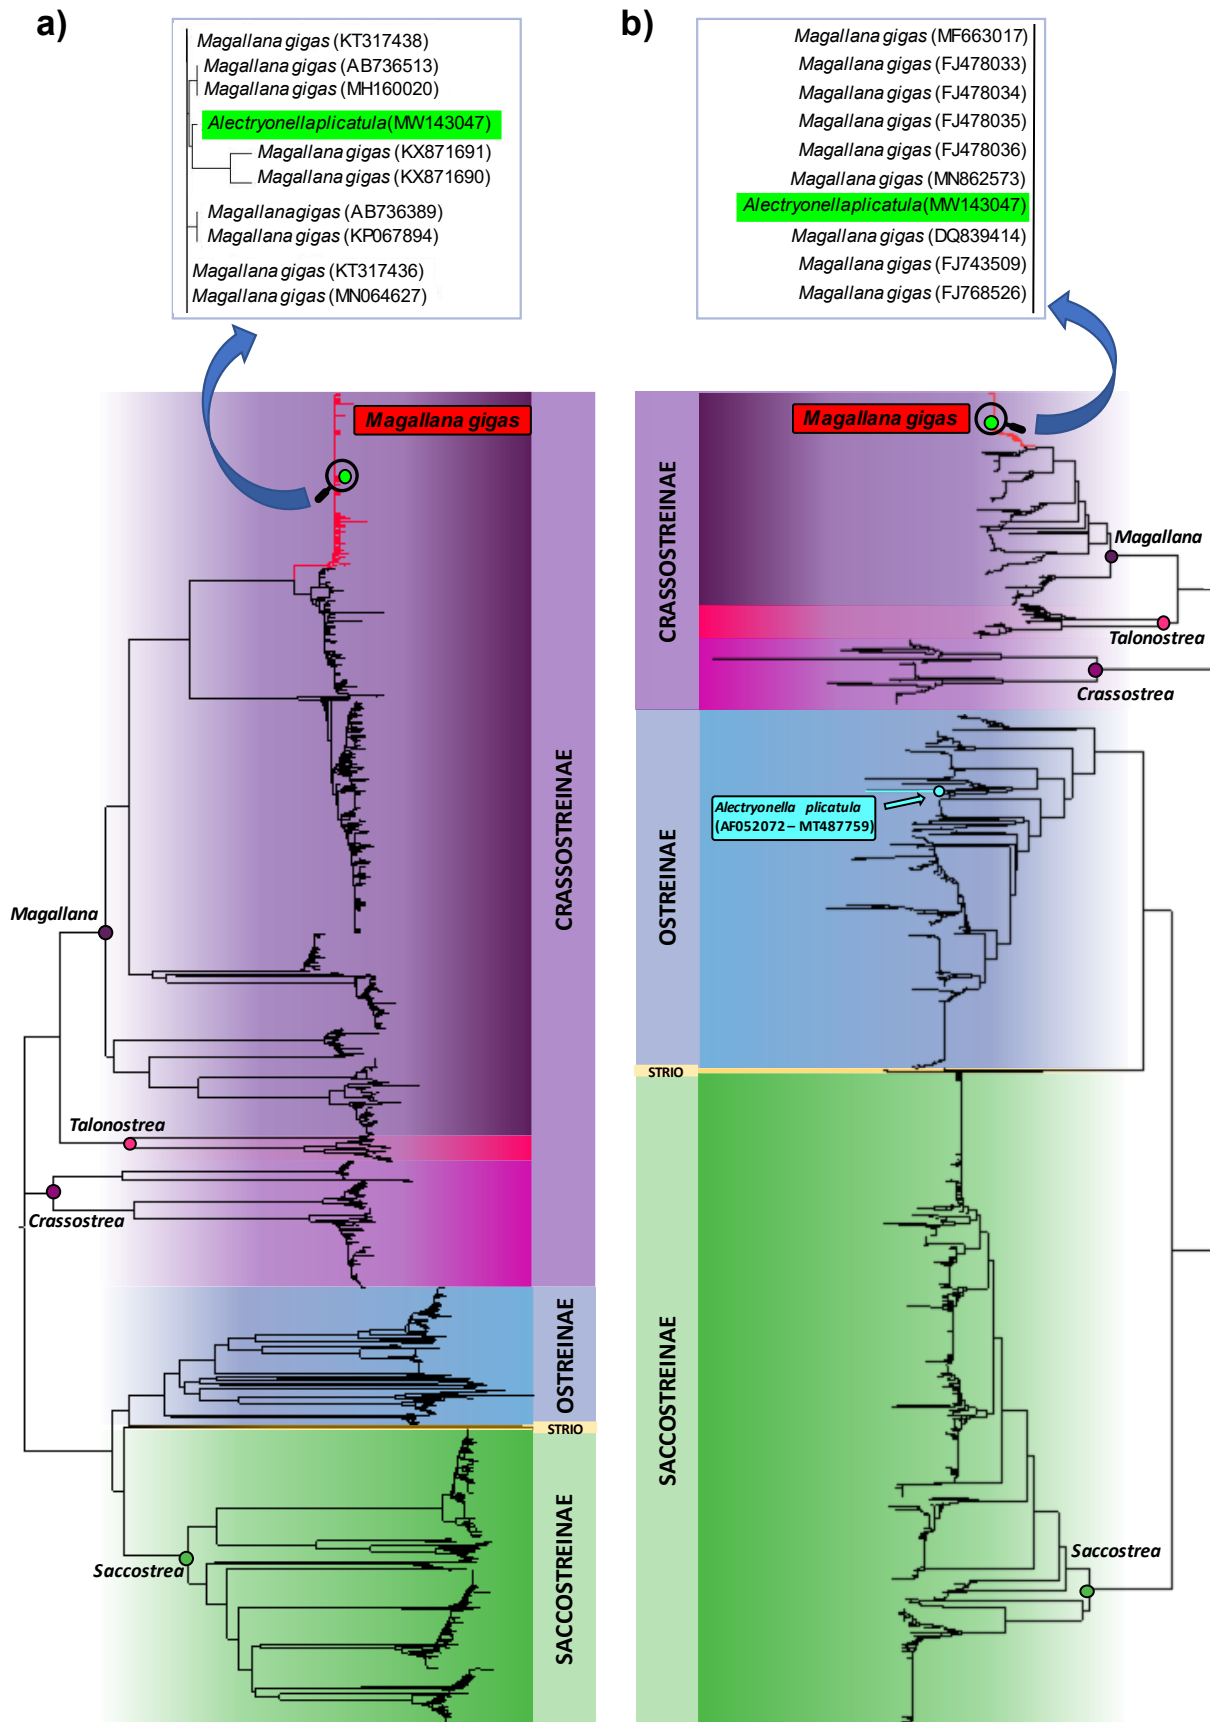

120 **Figure 1.** Neighbor-Joining trees based on 3639 *cox1* sequences (a) and 1839 16S sequences (b) available from public databases. In  
 121 both trees MW143047 is nested within the clade formed by sequences of *Magallana gigas* within the Crassostreinae lineage. Instead,  
 122 available 16S rRNA sequences of *Alectryonella plicatula* generated in previous studies cluster within the Ostreinae lineage.  
 123 (STRIO:Striostreinae).

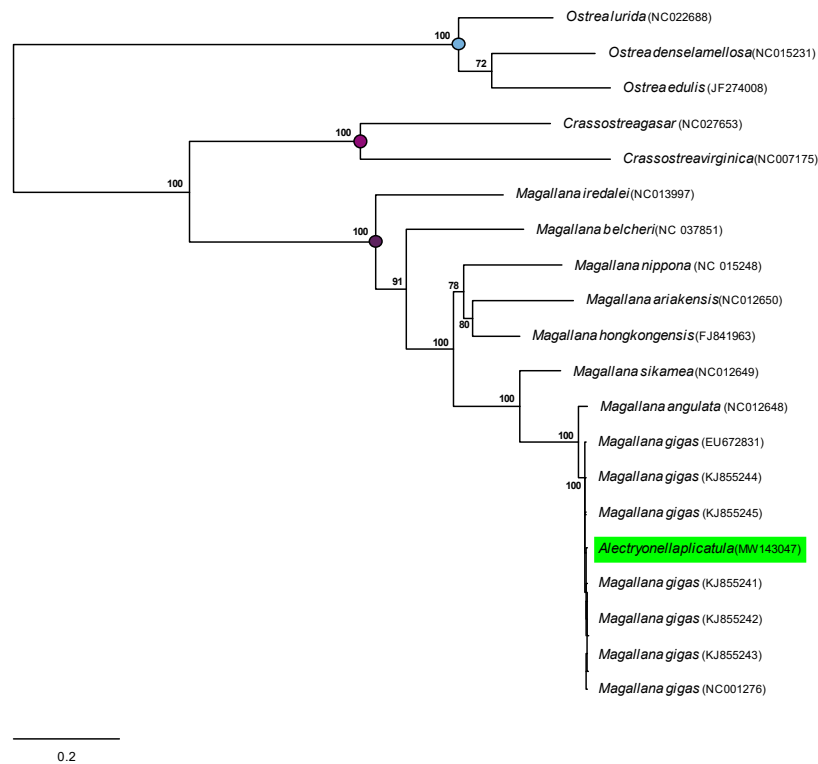

124 **Figure 2.** Maximum likelihood tree based on the concatenated sequences of 12 protein-coding from complete mitochondrial  
125 genomes of the same oyster taxa analysed by Wang et al. (2021) plus six additional mitogenome sequences of *Magallana gigas*. The  
126 mitogenome MW143047 is nested with the clade formed by mitogenomes of *M. gigas*.

127

128

## 129 Discussion

130 Results of DNA barcoding, BLAST and phylogenetic analyses show that MW143047, attributed by  
131 Wang et al. (2021) to the fingerprint oyster *Alectryonella plicatula*, is identical to mitochondrial DNA  
132 sequences of the Pacific cupped oyster *M. gigas* (Table 1). The MW143047 sequences cluster  
133 within the clade of *M. gigas* both in the gene trees based on the barcoding markers *cox1* and 16S  
134 and in the ML mitogenome tree based on concatenated sequence of 12 PCGs (Fig 1 and 2). On the  
135 other hand, two mitochondrial 16S rRNA sequences of *A. plicatula* generated in previous studies  
136 (Jozefowicz & O’Foighil, 1998; Ardura et al., 2021), and available in Genbank under the accession  
137 numbers (AF052072 and MT487759), show a high genetic divergence ( $p$ -distance: 19 and 18%  
138 respectively) with MW143047. The most likely explanation for these results is that the original  
139 specimen used for mitogenome sequencing was misidentified and represents an individual of *M.*  
140 *gigas*.

141 The hypothesis of contamination by DNA of *M. gigas*, either prior to PCR amplification or  
142 as PCR product prior to sequencing, is unlikely. In these cases, often chimera sequence artefacts are  
143 observed (e.g., Sangster & Luksenburg, 2020), whereas all PCGs and rRNA genes of MW143047  
144 are identical to sequences of *M. gigas* thus indicating that MW143047 is a *bona fide* mitogenome of

145 *M. gigas*. Even less likely is the hypothesis of mitochondrial introgression of *M. gigas* in *A.*  
146 *plicatula* following hybridization. Indeed, while these two species might co-occur in the collection  
147 site of the original specimen used for sequencing (Shicheng Island, Dalian; China), their genetic  
148 divergence is very large (~19% at the 16S rRNA) as they belong to distinct evolutionary lineages  
149 within Ostreidae Rafinesque, 1815 (*A. plicatula* belongs to the Ostreinae lineage whereas *M. gigas*  
150 to the Crassostreinae lineage; e.g. O’Foighil & Taylor, 2000; Salvi et al., 2014; Crocetta et al.,  
151 2015; Salvi & Mariottini, 2017; Al-Kandari et al., 2021).

152 While *Magallana gigas* in *Alectryonella plicatula* are readily distinguishable using  
153 mitochondrial (Liu et al., 2011; Crocetta et al., 2015) or nuclear markers (O’Foighil & Taylor,  
154 2000; Salvi et al., 2014; Mazón-Suástegui et al., 2016), morphological misidentification between  
155 the two might be easy as reported by Bishop et al (2017) due the extensive degree of phenotypic  
156 plasticity of oysters. This example highlights the common difficulties encountered for identifying  
157 oysters based on shell morphology alone, and provides one more demonstration that  
158 misidentification regards not only closely related species but also taxonomic ranks as high as  
159 subfamilies (discussed in Salvi & Mariottini, 2021; see Salvi et al. 2014 and Raith et al. 2016 for  
160 examples regarding the subfamilies Striostreinae Harry, 1985, Ostreinae Rafinesque, 1815 and  
161 Saccostreinae Salvi & Mariottini, 2016).

162 Previous studies on oyster systematics strongly advice that morphological identification of  
163 oysters should be validated by molecular data (e.g. Wang et al., 2004; Lam & Morton, 2006;  
164 Hamaguchi et al., 2107). This study also emphasizes that molecular data should be taxonomically  
165 validated by means of DNA barcoding and phylogenetic analyses. Taxonomic validation of  
166 mitogenomes is straightforward following the quality control guidelines of Botero-Castro et al.  
167 (2016) (see also Sangster & Luksenburg, 2020) and most of these recommendations can be applied  
168 also for an accurate identification of the sequences of single gene fragments. The publication of  
169 taxonomically misidentified sequences and mitogenomes can have profound implications if few  
170 sequences are available for the species so that misidentified sequence ends up as the reference for  
171 the species in public databases. In such cases misidentification errors can propagate in future studies  
172 that use the wrong reference-sequences in taxonomic and phylogenetic comparisons.

173

174

## 175 **Disclosure statement**

176 The authors report no conflict of interest.

177

## 178 **ORCID**

179 Daniele Salvi <http://orcid.org/0000-0002-3804-2690>

180 Emanuele Berrilli <http://orcid.org/0000-0001-8081-8600>

181 Matteo Garzia <http://orcid.org/0000-0002-0918-9925>

182 Paolo Mariottini <http://orcid.org/0000-0003-1044-7108>

183

## 184 **Data availability statement**

185 The data that support the findings of this study are openly available on GenBank at  
186 <https://www.ncbi.nlm.nih.gov/nucleotide>. Accession numbers of mitogenome sequences analysed  
187 are listed in Figure 2. Results of Blast and DNA-barcoding analyses are available from the authors  
188 upon request.

189

## 190 **References**

- 191 Al-Kandari M, Oliver PG, Salvi D., 2021. Molecular and morphological systematics of a new, reef  
192 forming, cupped oyster from the northern Arabian Gulf: *Talonostrea salpinx* new species. *Zookeys*,  
193 1043: 1-20.
- 194 Ardura A, Fernandez S, Haguenaer A, Planes S, Garcia-Vazquez E. 2021. Ship-driven  
195 biopollution: how aliens transform the local ecosystem diversity in Pacific islands. *Marine Pollution*  
196 *Bulletin* 166: 112251.
- 197 Bishop M, Brumbaugh R, Luckenbach M, Ruesink J. 2017. *Alectryonella plicatula*. The IUCN Red  
198 List of Threatened Species 2017: e.T200866A2683909. [https://dx.doi.org/10.2305/IUCN.UK.2017-](https://dx.doi.org/10.2305/IUCN.UK.2017-3.RLTS.T200866A2683909.en)  
199 [3.RLTS.T200866A2683909.en](https://dx.doi.org/10.2305/IUCN.UK.2017-3.RLTS.T200866A2683909.en).
- 200 Bortolus A. (2008). Error cascades in the biological sciences: the unwanted consequences of using  
201 bad taxonomy in ecology. *AMBIO: A journal of the human environment*, 37(2), 114-118.
- 202 Botero-Castro F, Delsuc F, Douzery EJ. 2016. Thrice better than once: quality control guidelines to  
203 validate new mitogenomes. *Mitochondrial DNA Part A*. 27(1):449–454
- 204 Crocetta F, Mariottini P, Salvi D, Oliverio M. 2015. Does GenBank provide a reliable DNA  
205 barcode reference to identify small alien oysters invading the Mediterranean Sea?. *Marine*  
206 *Biological Association of the United Kingdom. Journal of the Marine Biological Association of the*  
207 *United Kingdom*, 95(1), 111.
- 208 Hamaguchi M, Manabe M, Kajihara N, Shimabukuro H, Yamada Y, Nishi E. (2017). DNA  
209 barcoding of flat oyster species reveals the presence of *Ostrea stentina* Payraudeau, 1826 (Bivalvia:  
210 *Ostreidae*) in Japan. *Marine Biodiversity Records*, 10(1), 1-10.
- 211 Hsiao ST, Chuang SC, Chen KS, Ho PH, Wu CL, Chen CA. 2016. DNA barcoding reveals that the  
212 common cupped oyster in Taiwan is the Portuguese oyster *Crassostrea angulata* (Ostreoida;  
213 *Ostreidae*), not *C. gigas*. *Scientific Reports* 6, 34057
- 214 Jin S, Kim KY, Kim MS, Park C. (2020). An assessment of the taxonomic reliability of DNA  
215 barcode sequences in publicly available databases. *Algae*, 35(3), 293-301.
- 216 Jozefowicz CJ, O’Foighil D. 1998. Phylogenetic analysis of southern hemisphere flat oysters based  
217 on partial mitochondrial 16S rDNA gene sequences. *Molecular Phylogenetics and Evolution* 10:  
218 426–435
- 219 Kalyaanamoorthy S, Minh BQ, Wong TK, Von Haeseler A, Jermin LS. 2017. ModelFinder: fast  
220 model selection for accurate phylogenetic estimates. *Nature methods*, 14(6), 587-589.



- 221 Kumar S, Stecher G, Tamura K. 2016. MEGA7: molecular evolutionary genetics analysis version  
222 7.0 for bigger datasets. *Molecular biology and evolution*, 33(7), 1870-1874.
- 223 Lam K, Morton B. 2006. Morphological and mitochondrial DNA analysis of the Indo-West Pacific  
224 rock oysters (Ostreidae: *Saccostrea* species). *Journal of Molluscan Studies* 72: 235–245.
- 225 Liu JUN, Li QI, Kong L, Yu H, Zheng X. 2011. Identifying the true oysters (Bivalvia: Ostreidae)  
226 with mitochondrial phylogeny and distance-based DNA barcoding. *Molecular Ecology Resources*,  
227 11(5), 820-830.
- 228 Mazón-Suástegui JM, Fernández NT, Valencia I., Cruz-Hernández P, Latisnere-Barragán H.  
229 (2016). 28S rDNA as an alternative marker for commercially important oyster identification. *Food*  
230 *control*, 66, 205-214.
- 231 Nguyen LT, Schmidt HA, Von Haeseler A, Minh BQ. 2015. IQ-TREE: a fast and effective  
232 stochastic algorithm for estimating maximum-likelihood phylogenies. *Molecular biology and*  
233 *evolution*, 32(1), 268-274.
- 234 O’Foighil D, Taylor DJ. 2000. Evolution of parental care and ovulation behaviour in oysters.  
235 *Molecular Phylogenetics and Evolution* 15: 301–313
- 236 Raith M, Zacherl DC, Pilgrim EM, Eernisse DJ. (2016). Phylogeny and species diversity of Gulf of  
237 California oysters (Ostreidae) inferred from mitochondrial DNA. *American Malacological Bulletin*,  
238 33(2), 263-283.
- 239 Ren J, Liu X, Jiang F, Guo X, Liu B. (2010). Unusual conservation of mitochondrial gene order in  
240 *Crassostrea* oysters: evidence for recent speciation in Asia. *BMC Evolutionary Biology*, 10(1), 1-  
241 14.
- 242 Salvi D, Macali A, Mariottini P. (2014). Molecular phylogenetics and systematics of the bivalve  
243 family Ostreidae based on rRNA sequence-structure models and multilocus species tree. *PLoS One*,  
244 9(9), e108696.
- 245 Salvi D, Mariottini P. (2017). Molecular taxonomy in 2D: a novel ITS2 rRNA sequence-structure  
246 approach guides the description of the oysters' subfamily Saccostreinae and the genus *Magallana*  
247 (Bivalvia: Ostreidae). *Zoological Journal of the Linnean Society*, 179(2), 263-276.
- 248 Salvi D, Berrilli E, D’Alessandro P, Biondi M. 2020. Sharpening the DNA barcoding tool through a  
249 posteriori taxonomic validation: The case of *Longitarsus flea* beetles (Coleoptera: Chrysomelidae).  
250 *PloS one*, 15(5), e0233573.
- 251 Salvi D, Mariottini P. (2021). Revision shock in Pacific oysters taxonomy: the genus *Magallana*  
252 (formerly *Crassostrea* in part) is well-founded and necessary. *Zoological Journal of the Linnean*  
253 *Society*, 192(1), 43-58.
- 254 Sangster G, Luksenburg JA 2020. The published complete mitochondrial genome of *Eptesicus*  
255 *serotinus* is a chimera of *Vespertilio sinensis* and *Hypsugo alaschanicus* (Mammalia: Chiroptera).  
256 *Mitochondrial DNA Part B*, 5:3, 2661-2664

- 257 Wang H, Guo X, Zhang G, Zhang F. 2004. Classification of jinjiang oysters *Crassostrea rivularis*  
258 (Gould, 1861) from China, based on morphology and phylogenetic analysis. *Aquaculture* 242: 137–  
259 155
- 260 Wang Q, Liu H, Teng W, Yu Z, Liu X, Xie X, Yue C, Li D, Liang M, Li Q. 2021. Characterization  
261 of the complete mitochondrial genome of *Alectryonella plicatula* (Bivalvia: Ostreidae).  
262 *Mitochondrial DNA Part B*, 6(5), 1581-1582.
